# Supplementary material
Source: MDPI journal article supplement (https://www.mdpi.com/2071-1050/11/5/1381)
Supplement: s1 [file s1]

| Title                                                                                                                                                                                        | Type      | Background   | Full reference                                                                                                                                                                                                                                                                                                                   |
|----------------------------------------------------------------------------------------------------------------------------------------------------------------------------------------------|-----------|--------------|----------------------------------------------------------------------------------------------------------------------------------------------------------------------------------------------------------------------------------------------------------------------------------------------------------------------------------|
| Strategic perspectives of corporate sustainability management to develop a sustainable organization                                                                                          | Mapping   | Adapted      | BAUMGARTNER, R. J. & RAUTER, R. 2017. Strategic perspectives of corporate sustainability management to develop a sustainable organization. <i>Journal of Cleaner Production</i> , 140, 81-92.                                                                                                                                    |
| Value mapping for sustainable business thinking                                                                                                                                              | Mapping   | Adapted      | BOCKEN, N., RANA, P. & SHORT, S. 2015. Value mapping for sustainable business thinking. <i>Journal of Industrial and Production Engineering</i> , 32, 67-81.                                                                                                                                                                     |
| A framework for strategic sustainable development                                                                                                                                            | Mapping   | Adapted      | BROMAN, G. I. & ROBERT, K.-H. 2017. A framework for strategic sustainable development. <i>Journal of Cleaner Production</i> , 140, 17-31.                                                                                                                                                                                        |
| Corporate sustainability strategy—bridging the gap between formulation and implementation                                                                                                    | Mapping   | Adapted      | ENGERT, S. & BAUMGARTNER, R. J. 2016. Corporate sustainability strategy—bridging the gap between formulation and implementation. <i>Journal of Cleaner Production</i> , 113, 822-834.                                                                                                                                            |
| Exploring the integration of corporate sustainability into strategic management: a literature review                                                                                         | Mapping   | Adapted      | ENGERT, S., RAUTER, R. & BAUMGARTNER, R. J. 2016. Exploring the integration of corporate sustainability into strategic management: a literature review. <i>Journal of Cleaner Production</i> , 112, 2833-2850.                                                                                                                   |
| Green and Social Bonds: A high-level mapping to the Sustainable Development Goals                                                                                                            | Mapping   | Adapted      | ICMA. 2018. Green and Social Bonds: A high-level mapping to the Sustainable Development Goals. Paris, France: International Capital Market Association.                                                                                                                                                                          |
| Working Together Towards the Sustainable Development Goals: A Framework for Action                                                                                                           | Mapping   | SDG specific | BAXTER, G., NELSON, J., RIVERA, A. & TORRES-RAHMAN. 2015. Working Together Towards the Sustainable Development Goals: A Framework for Action. New York, USA: SDG Fund, Harvard Kennedy School CSR Initiative, Business Fights Poverty.                                                                                           |
| Embedding the Sustainable Development Goals into Business                                                                                                                                    | Mapping   | SDG specific | BFI. 2017. Embedding the Sustainable Development Goals into Business. Spain: Business Fights Poverty, Ashridge Centre for Business and Sustainability at Hult International Business School.                                                                                                                                     |
| The SDG Investment Case (PRI)                                                                                                                                                                | Mapping   | SDG specific | BULZOMI, A., DOUMA, K. & SCOTT, A. 2017. The SDG Investment Case. New York, USA: Principles for Responsible Investment, United Nations Global Compact, United Nations Environment Programme Finance Initiative, Price Waterhouse Coopers.                                                                                        |
| Unlocking the power of the Sustainable Development Goals: Creating greater impact through understanding and implementation (Deloitte)                                                        | Mapping   | SDG specific | DOBSON, P., TYAGI, S., DUGGAN, M. & ROCKWOOD, W. 2016. Unlocking the power of the Sustainable Development Goals: Creating greater impact through understanding and implementation. Sydney, Australia: Sustainability Services, Deloitte.                                                                                         |
| Toward a Multi-level Action Framework for Sustainable Development Goals                                                                                                                      | Mapping   | SDG specific | GUPTA, J. & NILSSON, M. 2017. Toward a Multi-level Action Framework for Sustainable Development Goals. Governing Through Goals: Sustainable Development Goals as Governance Innovation, 12, 275.                                                                                                                                 |
| Beyond cockpit-ism: Four insights to enhance the transformative potential of the sustainable development goals                                                                               | Mapping   | SDG specific | HAJER, M., NILSSON, M., RAWORTH, K., BAKKER, P., BERKHOUT, F., DE BOER, Y., ROCKSTRÖM, J., LUDWIG, K. & KOK, M. 2015. Beyond cockpit-ism: Four insights to enhance the transformative potential of the sustainable development goals. <i>Sustainability</i> , 7, 1651-1660.                                                      |
| Intersection of economic and environmental goals of sustainable development initiatives                                                                                                      | Mapping   | SDG specific | HALATI, A. & HE, Y. 2018. Intersection of economic and environmental goals of sustainable development initiatives. <i>Journal of Cleaner Production</i> , 189, 813-829.                                                                                                                                                          |
| Streamlining non-governmental organizations' programs towards achieving the sustainable development goals: A conceptual framework                                                            | Mapping   | SDG specific | HASSAN, M. M., LEE, K. E. & MOKHTAR, M. 2018. Streamlining non-governmental organizations' programs towards achieving the sustainable development goals: A conceptual framework. <i>Sustainable Development</i> , 1-8 (Online version).                                                                                          |
| How social enterprises can contribute to the Sustainable Development Goals (SDGs)—A conceptual framework                                                                                     | Mapping   | SDG specific | LITTLEWOOD, D. & HOLT, D. 2018. How social enterprises can contribute to the Sustainable Development Goals (SDGs)—A conceptual framework. <i>Entrepreneurship and the Sustainable Development Goals</i> . Emerald Publishing Limited.                                                                                            |
| The Gap Frame-Translating the SDGs into relevant national grand challenges for strategic business opportunities                                                                              | Mapping   | SDG specific | MUFF, K., KAPALKA, A. & DYLLICK, T. 2017. The Gap Frame-Translating the SDGs into relevant national grand challenges for strategic business opportunities. <i>The International Journal of Management Education</i> , 15, 363-383.                                                                                               |
| Harnessing the Sustainable Development Goals for businesses: A progressive framework for action                                                                                              | Mapping   | SDG specific | REDMAN, A. 2018. Harnessing the Sustainable Development Goals for businesses: A progressive framework for action. <i>Business Strategy &amp; Development</i> , 1, 230-243.                                                                                                                                                       |
| Getting Started with the Sustainable Development Goals: A guide for stakeholders                                                                                                             | Mapping   | SDG specific | SDSN. 2015. Getting Started with the Sustainable Development Goals: A guide for stakeholders. New York, USA: United Nations Sustainable Development Solutions Network.                                                                                                                                                           |
| SDG compass: The guide for business action on the SDGs                                                                                                                                       | Mapping   | SDG specific | UN COMPACT. 2015. SDG compass: The guide for business action on the SDGs. New York: UN Global Compact, Global Reporting Initiative, World Business Council for Sustainable Development.                                                                                                                                          |
| Multinational enterprises and the Sustainable Development Goals: An institutional approach to corporate engagement                                                                           | Mapping   | SDG specific | VAN ZANTEN, J. A. & VAN TULDER, R. 2018. Multinational enterprises and the Sustainable Development Goals: An institutional approach to corporate engagement. <i>Journal of International Business Policy</i> , 1, 208-233.                                                                                                       |
| Corporate sustainability in practice: An exploratory study of the sustainable development goals (SDG s)                                                                                      | Mapping   | SDG specific | VILDÅSEN, S. S. 2018. Corporate sustainability in practice: An exploratory study of the sustainable development goals (SDG s). <i>Business Strategy &amp; Development</i> , 1, 256-264.                                                                                                                                          |
| Business Diplomacy in Implementing the Global 2030 Development Agenda: Core Competencies Needed at the Corporate and Managerial Level                                                        | Mapping   | SDG specific | YIU, L. & SANER, R. 2017. Business Diplomacy in Implementing the Global 2030 Development Agenda: Core Competencies Needed at the Corporate and Managerial Level. <i>International Business Diplomacy: How Can Multinational Corporations Deal with Global Challenges?</i> : Emerald Publishing Limited.                          |
| Sustainable Development and Corporate Social Responsibility: Linking Goals to Standards                                                                                                      | Reporting | Adapted      | BAKARDJIEVA, R. 2016. Sustainable Development and Corporate Social Responsibility. Linking Goals to Standards. <i>Journal of Innovations and Sustainability</i> , 2, 23-35.                                                                                                                                                      |
| Achieving the United Nations Sustainable Development Goals: an enabling role for accounting research (PWC)                                                                                   | Reporting | Adapted      | REBBINGTON, J. & UNERMAN, J. 2018. Achieving the United Nations Sustainable Development Goals: an enabling role for accounting research. <i>Accounting, Auditing &amp; Accountability Journal</i> , 31, 2-24.                                                                                                                    |
| Integrated Reporting: Insights, gaps and an agenda for future research                                                                                                                       | Reporting | Adapted      | DE VILLIERS, C., RINALDI, L. & UNERMAN, J. 2014. Integrated Reporting: Insights, gaps and an agenda for future research. <i>Accounting, Auditing &amp; Accountability Journal</i> , 27, 1042-1067.                                                                                                                               |
| A closer look at the 'Global Reporting Initiative' sustainability reporting as a tool to implement environmental and social policies: A worldwide sector analysis                            | Reporting | Adapted      | DEL MAR ALONSO-ALMEIDA, M., LLAICH, J. & MARIMON, F. 2014. A closer look at the 'Global Reporting Initiative' sustainability reporting as a tool to implement environmental and social policies: A worldwide sector analysis. <i>Corporate Social Responsibility and Environmental Management</i> , 21, 318-335.                 |
| The SDGs and the sustainability assessment of private-sector projects: theoretical conceptualisation and comparison with current practice using the case study of the Asian Development Bank | Reporting | Adapted      | HACKING, T. 2019. The SDGs and the sustainability assessment of private-sector projects: theoretical conceptualisation and comparison with current practice using the case study of the Asian Development Bank. <i>Impact Assessment and Project Appraisal</i> , 37, 2-16.                                                       |
| Corporate sustainability and inclusive development: Highlights from international business and management research                                                                           | Reporting | Adapted      | KOURULA, A., PISANI, N. & KOK, A. 2017. Corporate sustainability and inclusive development: Highlights from international business and management research. <i>Current Opinion in Environmental Sustainability</i> , 24, 14-18.                                                                                                  |
| A Holistic approach to corporate sustainability assessment: Incorporating sustainable development goals into sustainable manufacturing performance evaluation                                | Reporting | Adapted      | MOLDAVSKA, A. & WELO, T. 2019. A Holistic approach to corporate sustainability assessment: incorporating sustainable development goals into sustainable manufacturing performance evaluation. <i>Journal of Manufacturing Systems</i> , 50, 53-68.                                                                               |
| Addressing the Sustainable Development Goals in sustainability reports: the relationship with institutional factors                                                                          | Reporting | Adapted      | ROSATI, F. & FARIA, L. G. D. 2018. Addressing the Sustainable Development Goals in sustainability reports: the relationship with institutional factors. <i>Journal of Cleaner Production</i> (Online Version).                                                                                                                   |
| Exploring the interface of CSR and the Sustainable Development Goals                                                                                                                         | Reporting | Adapted      | SCHÖNHERR, N., FINDLER, F. & MARTINUZZI, A. 2017. Exploring the interface of CSR and the Sustainable Development Goals. <i>Transnational Corporations</i> , 24, 33-49.                                                                                                                                                           |
| A review of corporate sustainability reporting tools (SRTs)                                                                                                                                  | Reporting | Adapted      | SIEW, R. Y. 2015. A review of corporate sustainability reporting tools (SRTs). <i>Journal of Environmental Management</i> , 164, 180-195.                                                                                                                                                                                        |
| Corporate Sustainability Assessments: MNE engagement with sustainable development and the SDGs                                                                                               | Reporting | Adapted      | TOPPLE, C., DONOVAN, J. D., MASUJ, E. K. & BORGERT, T. 2017. Corporate Sustainability Assessments: MNE engagement with sustainable development and the SDGs. <i>Transnational Corporations</i> , 24, 61-71.                                                                                                                      |
| Conceptualising the contemporary corporate value creation process                                                                                                                            | Reporting | SDG specific | ADAMS, C. A. 2017. Conceptualising the contemporary corporate value creation process. <i>Accounting, Auditing &amp; Accountability Journal</i> , 30, 906-931.                                                                                                                                                                    |
| How to Report on the SDGs: What good looks like and why it matters                                                                                                                           | Reporting | SDG specific | BLASCO, J., KING, A. & JAYARAM, S. 2018. How to Report on the SDGs: What good looks like and why it matters. Madrid, Spain: KPMG.                                                                                                                                                                                                |
| Private-Sector Collaboration for Sustainable Development                                                                                                                                     | Reporting | SDG specific | ISR. 2018. Private-Sector Collaboration for Sustainable Development. New York, USA: Business for Social Responsibility/The Rockefeller Foundation.                                                                                                                                                                               |
| A literature-based review on potentials and constraints in the implementation of the sustainable development goals                                                                           | Reporting | SDG specific | CAIADO, R. G. G., LEAL FILHO, W., QUELHAS, O. L. G., DE MATTOS NASCIMENTO, D. L. & ÁVILA, L. V. 2018. A literature-based review on potentials and constraints in the implementation of the sustainable development goals. <i>Journal of Cleaner Production</i> , 198, 1276-1288.                                                 |
| The multinational and the legitimization of sustainable development                                                                                                                          | Reporting | SDG specific | DONOHER, W. J. 2017. The multinational and the legitimization of sustainable development. <i>Transnational Corporations</i> , 24, 49-61.                                                                                                                                                                                         |
| Introducing a sustainability evaluation framework based on the Sustainable Development Goals applied to four cases of South African frugal innovation                                        | Reporting | SDG specific | DRESSLER, A. & BUCHER, J. 2018. Introducing a sustainability evaluation framework based on the Sustainable Development Goals applied to four cases of South African frugal innovation. <i>Business Strategy &amp; Development</i> , 1, 276-285.                                                                                  |
| KPMG - How to report on the SDGs                                                                                                                                                             | Reporting | SDG specific | KPMG. 2018. How to report on the SDGs. Switzerland: KPMG Global Centre for Sustainability and Climate Change.                                                                                                                                                                                                                    |
| Make it your business: Engaging with the Sustainable Development Goals                                                                                                                       | Reporting | SDG specific | PRESTON, M. & SCOTT, L. 2015. Make it your business: Engaging with the Sustainable Development Goals. London, UK: PricewaterhouseCoopers.                                                                                                                                                                                        |
| SDG Reporting Challenge Report (PWC)                                                                                                                                                         | Reporting | SDG specific | PWC. 2017. SDG Reporting Challenge Report. London, UK: PricewaterhouseCoopers.                                                                                                                                                                                                                                                   |
| Business contribution to the Sustainable Development Agenda: Organizational factors related to early adoption of SDG reporting                                                               | Reporting | SDG specific | ROSATI, F. & FARIA, L. G. D. 2018. Business contribution to the Sustainable Development Agenda: Organizational factors related to early adoption of SDG reporting. <i>Corporate Social Responsibility and Environmental Management</i> , 1-10 (Online version)                                                                   |
| Corporate Sustainability Assessments: MNE engagement with sustainable development and the SDGs                                                                                               | Reporting | SDG specific | TOPPLE, C., DONOVAN, J. D., MASUJ, E. K. & BORGERT, T. 2017. Corporate Sustainability Assessments: MNE engagement with sustainable development and the SDGs. <i>Transnational Corporations</i> , 24, 61-71.                                                                                                                      |
| Better Business, Better World: The Business Case for the Sustainable Development Goals                                                                                                       | Alignment | Adapted      | BOYD, O., CAMPBELL, G., DEWAN, N., EVANS, A., GEORGE, M., GEORGE, S., KLINTWORTH, G., KORTENHORST, A., MCLEOD, D., OPPENHEIM, J., POTOCNIK, J., SAWERS, C. & SHAH, A. 2017. Better Business, Better World: The Business Case for the Sustainable Development Goals. London, UK: Business and Sustainable Development Commission. |
| From an ideal dream towards reality analysis: Proposing Sustainable Value Exchange Matrix (SVEM) from systematic literature review on sustainable business models and face validation        | Alignment | Adapted      | MORIOKA, S. N., BOLIS, I. & CARVALHO, M. M. 2018. From an ideal dream towards reality analysis: Proposing Sustainable Value Exchange Matrix (SVEM) from systematic literature review on sustainable business models and face validation. <i>Journal of Cleaner Production</i> , 178, 76-88.                                      |
| Transforming sustainability challenges into competitive advantage: Multiple case studies kaleidoscope converging into sustainable business models                                            | Alignment | Adapted      | MORIOKA, S. N., BOLIS, I., EVANS, S. & CARVALHO, M. M. 2017. Transforming sustainability challenges into competitive advantage: Multiple case studies kaleidoscope converging into sustainable business models. <i>Journal of Cleaner Production</i> , 167, 723-738.                                                             |
| Building Business Models around Sustainable Development Goals                                                                                                                                | Alignment | Adapted      | RAITH, M. G. & SIEBOLD, N. 2018. Building Business Models around Sustainable Development Goals. <i>Journal of Business Models</i> , 6, 71-77.                                                                                                                                                                                    |
| Going one's own way: drivers in developing business models for sustainability                                                                                                                | Alignment | Adapted      | RAUTER, R., JONKER, J. & BAUMGARTNER, R. J. 2017. Going one's own way: drivers in developing business models for sustainability. <i>Journal of Cleaner Production</i> , 140, 144-154.                                                                                                                                            |
| Using industrial ecology and strategic management concepts to pursue the Sustainable Development Goals                                                                                       | Alignment | Adapted      | SULLIVAN, K., THOMAS, S. & ROSANO, M. 2018. Using industrial ecology and strategic management concepts to pursue the Sustainable Development Goals. <i>Journal of Cleaner Production</i> , 174, 237-246.                                                                                                                         |
